# Supplementary material for: Rapid thermal processing and separation performance of columnar MFI membranes on porous stainless steel tubes
Source: Royal Society of Chemistry journal article supplement (doi:10.1039/c1ee01700d), 2011-01-01
Supplement: c1ee01700d.pdf [file c1ee01700d.pdf]

# **Rapid Thermal Processing and Separation Performance of Columnar MFI Membranes on Porous Stainless Steel Tubes**

Jared A. Stoeger<sup>1</sup>, Jungkyu Choi<sup>2,\*</sup>, and Michael Tsapatsis<sup>1,\*</sup>

<sup>1</sup>Department of Chemical Engineering and Materials Science, University of Minnesota-Twin Cities, 421 Washington Avenue SE, Minneapolis, MN 55455 USA

<sup>2</sup>Research Institute of Clean Chemical Engineering Systems, Department of Chemical & Biological Engineering, Korea University, Anam-dong, Seongbuk-gu, Seoul 136-713 Republic of Korea

\*Corresponding Authors:

(J.C.) Email: jungkyu\_choi@korea.ac.kr, Phone: +82-2-3290-4275, Fax: +82-2-926-6102

(M.T.) Email: tsapatsis@umn.edu, Phone: (612) 626-0920, Fax: (612) 626-7246

Supporting Online Material

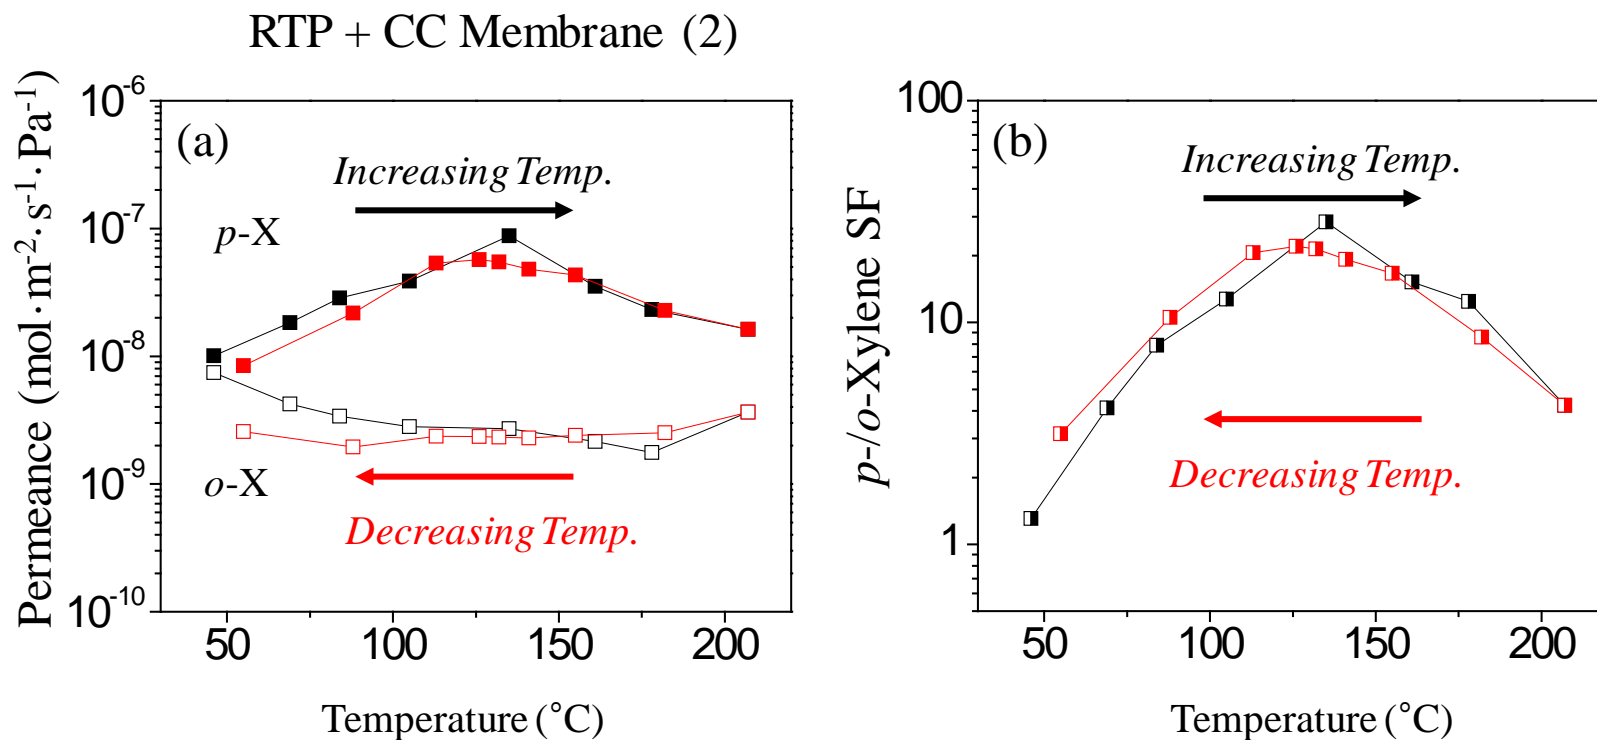

**Figure S1.** (a) Permeances of *p*-xylene (filled symbols) and *o*-xylene (open symbols), and (b) the corresponding *p*-/*o*-xylene separation factors (SF) for a membrane subjected to RTP+CC. Permeation measurements with a heating-cycle were carried out by increasing and then decreasing the permeation cell temperature: the black symbols represent the permeation data obtained with increasing temperature, while the red symbols are permeation data obtained with decreasing temperature.

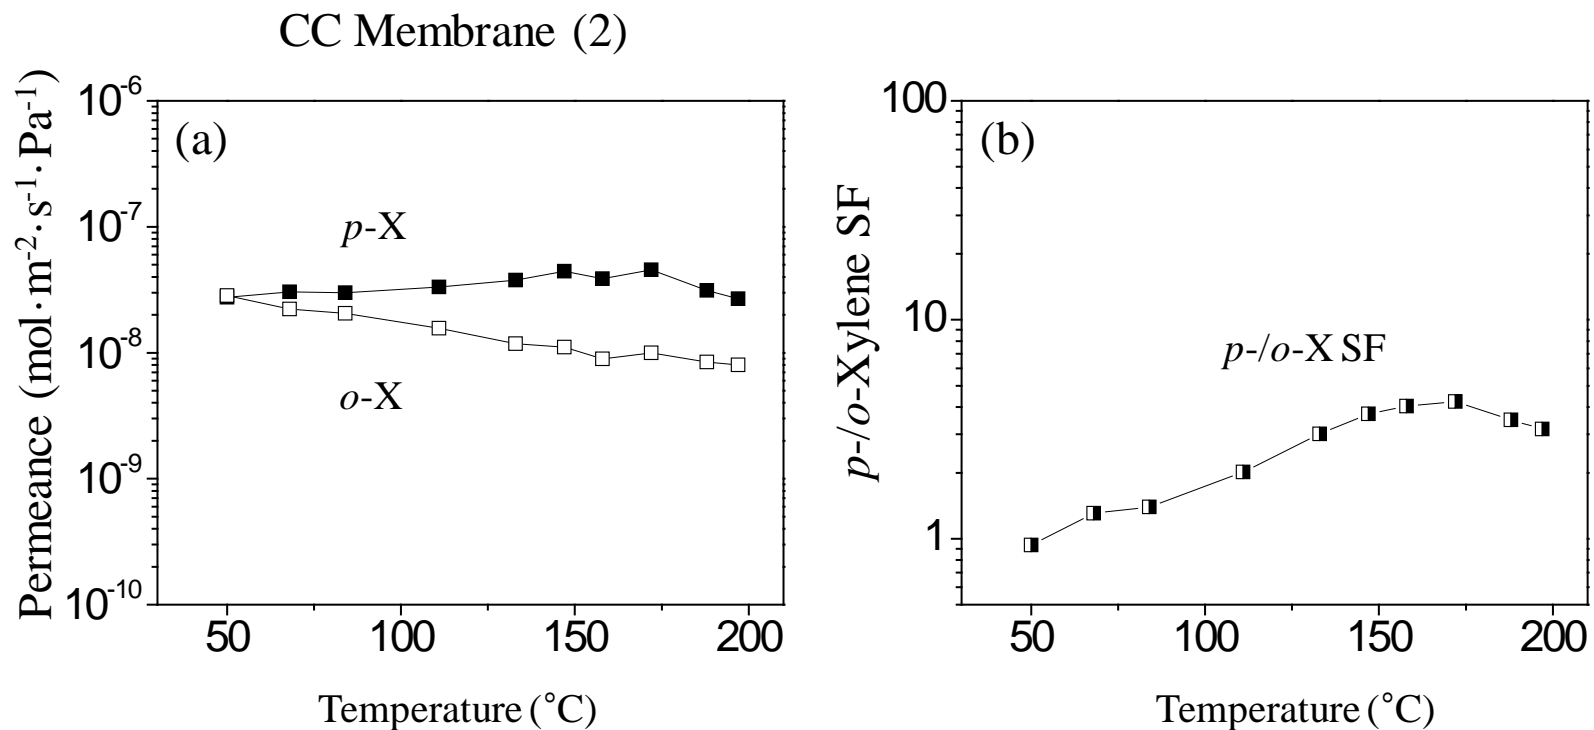

**Figure S2.** (a) Permeances of *p*-xylene (filled symbols) and *o*-xylene (open symbols), and (b) the corresponding *p*-/*o*-xylene separation factors (SF) for a membrane subjected to conventional calcination (CC).

## References

- [1] De Vos, R. M.; Verweij, H. *Science* **1998**, *279*, 1710-1711.
- [2] Holt, J. K.; Park, H. G.; Wang, Y.; Stadermann, M.; Artyukhin, A. B.; Grigoropoulos, C. P.; Noy, A.; Bakajin, O. *Science* **2006**, *312*, 1034-1037.
- [3] Jirage, K. B.; Hulteen, J. C.; Martin, C. R. *Science* **1997**, *278*, 655-658.
- [4] Merkel, T. C.; Freeman, B. D.; Spontak, R. J.; He, Z.; Pinnau, I.; Meakin, P.; Hill, A. J. *Science* **2002**, *296*, 519-522.
- [5] Shiflett, M. B.; Foley, H. C. *Science* **1999**, *285*, 1902-1905.
- [6] Davis, M. E. *Nature* **2002**, *417*, 813-821.
- [7] Lin, Y. S.; Kumakiri, I.; Nair, B. N.; Alsayouri, H. *Sep. Purif. Methods* **2002**, *31*, 229-379.
- [8] Caro, J.; Noack, M.; Koelsch, P. *Adsorption* **2005**, *11*, 215-227.
- [9] Morigami, Y.; Kondo, M.; Abe, J.; Kita, H.; Okamoto, K. *Sep. Purif. Technol.* **2001**, *25*, 251-260.
- [10] Caro, J.; Noack, M. *Micropor. Mesopor. Mater.* **2008**, *115*, 215-233.
- [11] Gouzinis, A.; Tsapatsis, M. *Chem. Mater.* **1998**, *10*, 2497-2504.
- [12] Hedlund, J.; Mintova, S.; Sterte, J. *Micropor. Mesopor. Mater.* **1999**, *28*, 185-194.
- [13] Lai, Z.; Bonilla, G.; Diaz, I.; Nery, J. G.; Sujaoti, K.; Amat, M. A.; Kokkoli, E.; Terasaki, O.; Thompson, R. W.; Tsapatsis, M.; Vlachos, D. G. *Science* **2003**, *300*, 456-460.
- [14] Lovallo, M. C.; Tsapatsis, M. *AIChE J.* **1996**, *42*, 3020-3029.
- [15] Choi, J.; Ghosh, S.; Lai, Z.; Tsapatsis, M. *Angew. Chem., Int. Ed.* **2006**, *45*, 1154-1158.
- [16] Hedlund, J.; Sterte, J.; Anthonis, M.; Bons, A.-J.; Carstensen, B.; Corcoran, N.; Cox, D.; Deckman, H.; De Gijst, W.; de Moor, P.-P.; Lai, F.; McHenry, J.; Mortier, W.; Reinoso, J.; Peters, J. *Micropor. Mesopor. Mater.* **2002**, *52*, 179-189.

- [17] Choi, J.; Jeong, H. K.; Snyder, M. A.; Stoeger, J. A.; Masel, R. I.; Tsapatsis, M. *Science* **2009**, *325*, 590-593.
- [18] Yoo, W. C.; Stoeger, J. A.; Lee, P. S.; Tsapatsis, M.; Stein, A. *Angew. Chem., Int. Ed.* **2010**, *49*, 8699-8703.
- [19] Lee, P.-S.; Zhang, X.; Stoeger, J. A.; Malek, A.; Fan, W.; Kumar, S.; Yoo, W. C.; Al Hashimi, S.; Penn, R. L.; Stein, A.; Tsapatsis, M. *J. Am. Chem. Soc.* **2011**, *133*, 493-502.
- [20] Alfaro, S.; Arruebo, M.; Coronas, J.; Menendez, M.; Santamaria, J. *Micropor. Mesopor. Mater.* **2001**, *50*, 195-200.
- [21] Gora, L.; Jansen, J. C. *J. Catal.* **2005**, *230*, 269-281.
- [22] Miachon, S.; Ciavarella, P.; van Dyk, L.; Kumakiri, I.; Fiaty, K.; Schuurman, Y.; Dalmon, J.-A. *J. Membr. Sci.* **2007**, *298*, 71-79.
- [23] Daramola, M. O.; Burger, A.J.; Pera-Titus, M.; Giroir-Fendler, A.; Lorenzen, L.; Dalmon, J.-A. *Sep. Sci. Technol.* **2010**, *45*, 21-27.
- [24] Tarditi, A. M.; Horowitz, G. I.; Lombardo, E. A. *Catal. Lett.* **2008**, *123*, 7-15.
- [25] Tarditi, A. M.; Lombardo, E. A. *Sep. Purif. Technol.* **2008**, *61*, 136-147.
- [26] Wang, H.; Wang, Z.; Yan, Y. *Chemical Communications (Cambridge)* **2000**, 2333-2334.
- [27] Choi, J.; Ghosh, S.; King, L.; Tsapatsis, M. *Adsorption* **2006**, *12*, 339-360.
- [28] Choi, J.; Lai, Z.; Ghosh, S.; Beving, D. E.; Yan, Y.; Tsapatsis, M. *Ind. Eng. Chem. Res.* **2007**, *46*, 7096-7106.
- [29] Lee, J. S.; Ha, K.; Lee, Y.-J.; Yoon, K. B. *Adv. Mater.* **2005**, *17*, 837-841.
- [30] Lai, Z.; Tsapatsis, M. *Ind. Eng. Chem. Res.* **2004**, *43*, 3000-3007.
- [31] Keizer, K.; Burggraaf, A. J.; Vroon, Z. A. E. P.; Verweij, H. *J. Membr. Sci.* **1998**, *147*, 159-172.

- [32] Gump, C. J.; Tuan, V. A.; Noble, R. D.; Falconer, J. L. *Ind. Eng. Chem. Res.* **2001**, *40*, 565-577.
- [33] Tarditi, A. M.; Horowitz, G. I.; Lombardo, E. A. *J. Membr. Sci.* **2006**, *281*, 692-699.
- [34] Tarditi, A. M.; Irusta, S.; Lombardo, E. A. *Chem. Eng. J.* **2006**, *122*, 167-174.
- [35] Gu, X.; Dong, J.; Nenoff, T. M.; Ozokwelu, D. E. *J. Membr. Sci.* **2006**, *280*, 624-633.
- [36] Mabande, G. T. P.; Noack, M.; Avhale, A.; Kolsch, P.; Georgi, G.; Schwieger, W.; Caro, J. *Microporous Mesoporous Mater.* **2007**, *98*, 55-61.
- [37] Xomeritakis, G.; Tsapatsis, M. *Chem. Mater.* **1999**, *11*, 875-878.
- [38] van Dyk, L.; Lorenzen, L.; Miachon, S.; Dalmon, J.-A. *Catal. Today* **2005**, *104*, 274-280.
- [39] Haag, S.; Hanebuth, M.; Mabande, G. T. P.; Avhale, A.; Schwieger, W.; Dittmeyer, R. *Microporous Mesoporous Mater.* **2006**, *96*, 168-176.
- [40] Zhang, C.; Hong, Z.; Gu, X.; Zhong, Z.; Jin, W.; Xu, N. *Ind. Eng. Chem. Res.* **2009**, *48*, 4293-4299.
- [41] Bernal, M. P.; Xomeritakis, G.; Tsapatsis, M. *Catalysis Today* **2001**, *67*, 101-107.
- [42] Sano, T.; Yanagishita, H.; Kiyozumi, Y.; Mizukami, F.; Haraya, K. *J. Membr. Sci.* **1994**, *95*, 221-228.
- [43] Li, S.; Tuan, V. A.; Falconer, J. L.; Noble, R. D. *Micropor. Mesopor. Mater.* **2003**, *58*, 137-154.
- [44] Bowen, T. C.; Kalipcilar, H.; Falconer, J. L.; Noble, R. D. *J. Membr. Sci.* **2003**, *215*, 235-247.
- [45] Shen, D.; Xiao, W.; Yang, J. H.; Chu, N. B.; Lu, J. M.; Yin, D. H.; Wang, J. Q. *Sep. Purif. Technol.* **2011**, *76*, 308-315.
- [46] Lin, X.; Chen, X. S.; Kita, H.; Okamoto, K. *AIChE Journal* **2003**, *49*, 237-247.

- [47] Lin, X.; Kita, H.; Okamoto, K. *Ind. Eng. Chem. Res.* **2001**, *40*, 4069-4078.
- [48] Nomura, M.; Yamaguchi, T.; Nakao, S. *J. Membr. Sci.* **1998**, *144*, 161-171.
- [49] Nomura, M.; Yamaguchi, T.; Nakao, S. *J. Membr. Sci.* **2001**, *187*, 203-212.
- [50] Sano, T.; Hasegawa, M.; Kawakami, Y.; Yanagishita, H. *J. Membr. Sci.* **1995**, *107*, 193-196.
- [51] Ikegami, T.; Yanagishita, H.; Kitamoto, D.; Haraya, K.; Nakane, T.; Matsuda, H.; Koura, N.; Sano, T. *Biotechnology Techniques* **1997**, *11*, 921-924.
- [52] Matsuda, H.; Yanagishita, H.; Negishi, H.; Kitamoto, D.; Ikegami, T.; Haraya, K.; Nakane, T.; Idemoto, Y.; Koura, N.; Sano, T. *J. Membr. Sci.* **2002**, *210*, 433-437.
- [53] Chen, H. L.; Li, Y. S.; Yang, W. S. *J. Membr. Sci.* **2007**, *296*, 122-130.
- [54] Tuan, V. A.; Li, S. G.; Falconer, J. L.; Noble, R. D. *J. Membr. Sci.* **2002**, *196*, 111-123.
- [55] Kuhn, J.; Sutanto, S.; Gascon, J.; Gross, J.; Kapteijn, F. *J. Membr. Sci.* **2009**, *339*, 261-274.
- [56] Sebastian, V.; Mallada, R.; Coronas, J.; Julbe, A.; Terpstra, R. A.; Dirrix, R. W. J. *J. Membr. Sci.* **2010**, *355*, 28-35.
- [57] Soydas, B.; Dede, O.; Culfaz, A.; Kalipcilar, H. *Micropor. Mesopor. Mater.* **2010**, *127*, 96-103.
- [58] Hasegawa, Y.; Kimura, K.; Nemoto, Y.; Nagase, T.; Kiyozumi, Y.; Nishide, T.; Mizukami, F. *Sep. Purif. Technol.* **2008**, *58*, 386-392.
- [59] Weyd, M.; Richter, H.; Puhlfurss, P.; Voigt, I.; Hamel, C.; Seidel-Morgenstern, A. *J. Membr. Sci.* **2008**, *307*, 239-248.
- [60] Kalipcilar, H.; Gade, S.K.; Noble, R.D.; Falconer, J.L. *J. Membr. Sci.* **2002**, *210*, 113-127.
